# Supplementary material for: Looking on the Bright Side of Life
Source: Atypon-hosted journal article supplement (doi:10.1026/0942-5403/a000439), 2024-01-01
Supplement: 0942-5403_a000439_esm1.pdf [file 0942-5403_a000439_esm1.pdf]

## ESM 1 Semi structured interview in German

### Instruktion Schritt 1:

Bitte lese dir alle Fragen des Fragebogens einmal durch. Wenn du die Fragen alle einmal gelesen hast, lies sie bitte noch einmal und unterstreiche alle Wörter, die du schwierig findest oder die du nicht verstehst.

*Dann werden alle Wörter besprochen, die das Kind unterstrichen hat. Das Wort wird erklärt und mit dem Kind gemeinsam wird eine Formulierung gesucht, die besser verständlich ist.*

*Anmerkung: Wenn das Kind keine Wörter benennt, Schlüsselwörter aus allen Items abfragen.*

### Instruktion Schritt 2:

Super, vielen Dank! Jetzt schauen wir uns einmal die Antworten an. Bitte kreuze einmal den Fragebogen an, so wie du ihn für dich beantworten würdest.

*Dann werden Antworten rausgesucht, bei denen das Kind eine 0, eine 1, eine 2 und eine 3 angerkreuzt hat.*

„Hier hast du „drei – stimme voll zu angekreuzt“. Kannst du mir erklären, was das für dich bedeutet? *(Hier direkt auf das Item beziehen)*

*Dieser Schritt wird für die anderen Antwortstufen wiederholt um sicherzustellen, dass die Kinder die Antwortskala verstanden haben.*

### Instruktion Schritt 3:

Super, vielen Dank! Das hast du wirklich toll gemacht! Gibt es ansonsten noch etwas, was dir einfällt, wie wir den Fragebogen besser machen können? Möchtest du ansonsten uns noch etwas sagen?

*In diesem Schritt bekommen die Kinder die Möglichkeit weiteres Feedback zu geben. Wenn keine Rückmeldungen mehr kommen, kann das Interview an dieser Stelle beendet werden.*
