# Supplementary material for: Looking on the Bright Side of Life
Source: Atypon-hosted journal article supplement (doi:10.1026/0942-5403/a000439), 2024-01-01
Supplement: 0942-5403_a000439_esm2.pdf [file 0942-5403_a000439_esm2.pdf]

**Table ESM 2: Comparison of the models with the item regarding peer relations and the model including the item regarding being calm.**

|                               | Chi Square | CFI | TLI | SRMR | RSMEA |
|-------------------------------|------------|-----|-----|------|-------|
| Model with peer relation item | 31.14      | .98 | .97 | .06  | .04   |
| Model with calm item          | 27.78      | 1.0 | 1.0 | .06  | .02   |
